# Supplementary material for: Susceptibility of Protein Methionine Oxidation in Response to Hydrogen Peroxide Treatment–Ex Vivo versus In Vitro: A Computational Insight
Source: MDPI journal article supplement (doi:10.3390/antiox9100987), 2020-10-13
Supplement: s1 [file s1]

## Supplementary Material

Supplementary Figure S1.

Supplementary Figure S2.

Supplementary Table S1.

Supplementary Table S2.

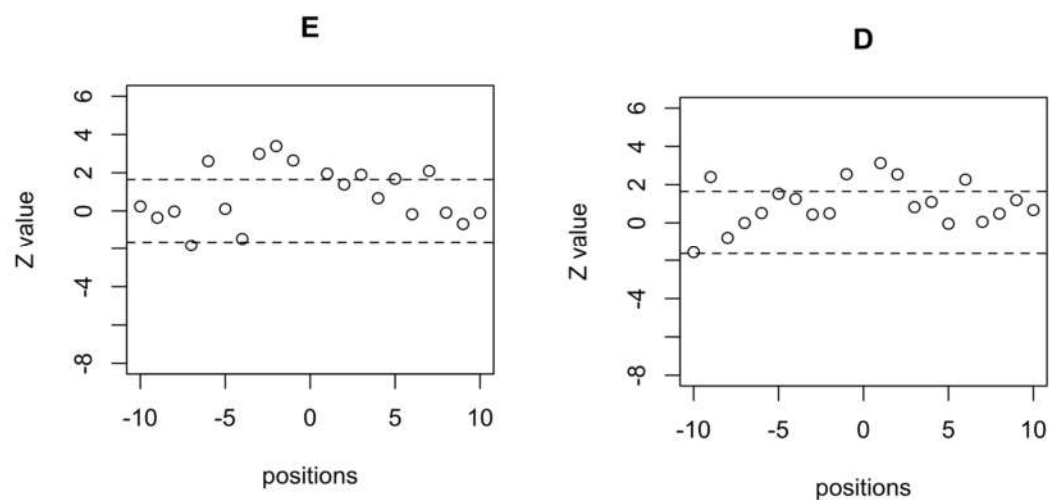

**Figure S1.** Overrepresentation of acidic residues in the sequence environment of MetO oxidized *in vivo* in *Arabidopsis thaliana*. Data were obtained from MetOSite (<https://metosite.uma.es>), and they were originated mainly in two proteomic studies (Mol Cell Proteomics 2015, 14(5):1217-29; Cell Commun Signal 2013, 11(1):1).

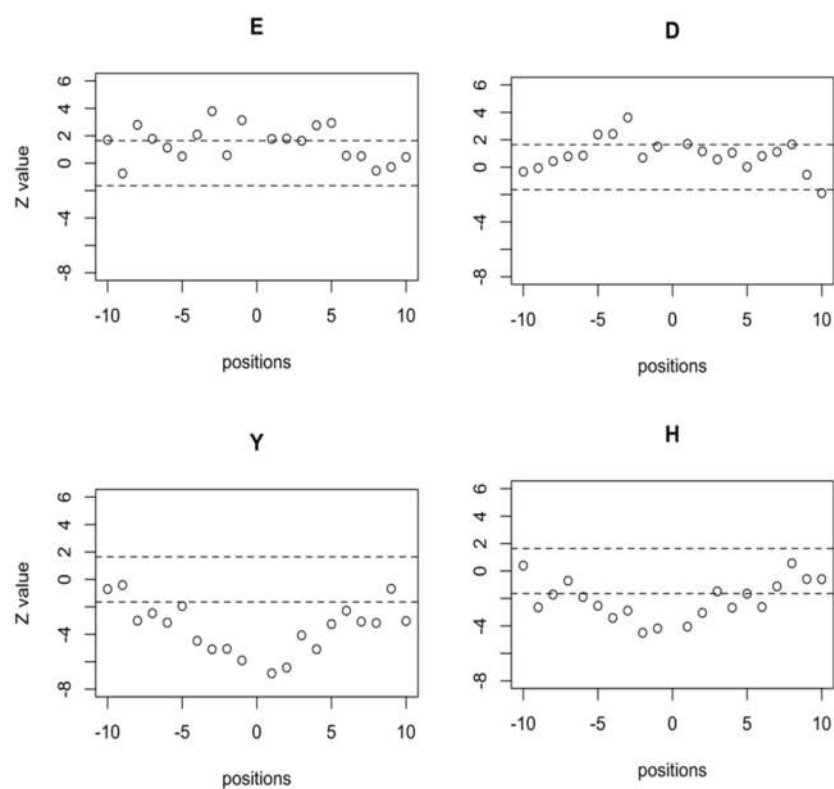

**Figure S2.** Sequence environment analyses within the cytosolic subset of *ex vivo* oxidized proteins. Acidic residues are overrepresented while tyrosine and histidine are underrepresented in the MetO environments of the cytosolic subset of protein oxidized *ex vivo*.

**Table S1.** References related to the proteomic studies describing the MetO sites used in the current work. The number of the MetO sites, the title of the paper, the digital object identifier (DOI), the PubMed identifier (PMID) and the dataset to which the sites belong are given. Note that the same MetO site can appear in different studies.

| <b>Number of sites</b> | <b>Title</b>                                                                                            | <b>DOI</b>                    | <b>PMID</b> | <b>Dataset</b>  |
|------------------------|---------------------------------------------------------------------------------------------------------|-------------------------------|-------------|-----------------|
| 2484                   | Redox proteomics of protein-bound methionine oxidation                                                  | 10.1074/mcp.M110.006866       | 21406390    | <i>Ex vivo</i>  |
| 2454                   | Global analysis of methionine oxidation provides a census of folding stabilities for the human proteome | 10.1073/pnas.1819851116       | 30846556    | <i>In vitro</i> |
| 26                     | Quantitative analysis of in vivo methionine oxidation of the human proteome                             | 10.1021/acs.jproteome.9b00505 | 31801345    | <i>Ex vivo</i>  |

**Table S2.** Subcellular clusters containing at least 10 proteins from the dataset.

a: (% of the cluster proteins contributed by *ex vivo*)

b : (% of the *ex vivo* proteins set contributing to the cluster)

c: Fisher's exact test for count data. those clusters with p-value < 0.02 are emphasized in bold.

Nuc: nucleus; Cyt: cytosol; Mit: mitochondrium; Plm: plasmalemma; ER: endoplasmic reticulum; Ske: cytoskeleton; Gol: Golgi; End: endosome

| <i>Cluster</i> | <i>Compartment</i>        | <i>Number</i>   | <i>%</i>                    | <i>% Ex vivo</i>        | <i>p-Value</i> <sup>c</sup> |
|----------------|---------------------------|-----------------|-----------------------------|-------------------------|-----------------------------|
|                |                           | <i>Proteins</i> | <i>Cluster</i> <sup>a</sup> | <i>set</i> <sup>b</sup> |                             |
| 1              | <b><i>Nuc</i></b>         | 284             | 89.8                        | 19.2                    | < 2 10 <sup>-16</sup>       |
| 2              | Nuc-Cyt                   | 243             | 65.0                        | 11.5                    | 0.176                       |
| 3              | <b><i>Cyt</i></b>         | 160             | 44.4                        | 4.9                     | 1.7 10 <sup>-6</sup>        |
| 4              | Miscellanea               | 116             | 69.9                        | 5.4                     | 0.917                       |
| 5              | <b><i>Mit</i></b>         | 80              | 98.8                        | 5.2                     | 3 10 <sup>-12</sup>         |
| 6              | Plm-Cyt                   | 45              | 57.8                        | 1.7                     | 0.105                       |
| 7              | ER                        | 45              | 55.6                        | 1.6                     | 0.071                       |
| 8              | Ske-Cyt                   | 43              | 62.8                        | 1.7                     | 0.405                       |
| 9              | <b><i>Nuc-Plm-Cyt</i></b> | 41              | 48.8                        | 1.3                     | 0.009                       |
| 10             | Nuc-Ske-Cyt               | 32              | 68.8                        | 1.4                     | 0.999                       |
| 11             | Mit-Nuc-Cyt               | 28              | 64.3                        | 1.1                     | 0.680                       |
| 12             | Plm                       | 27              | 66.7                        | 1.1                     | 0.835                       |
| 13             | <b><i>Mit-Nuc</i></b>     | 27              | 92.6                        | 1.6                     | 0.005                       |
| 14             | Mit-Cyt                   | 23              | 56.5                        | 0.8                     | 0.255                       |
| 15             | <b><i>Plm-Ske-Cyt</i></b> | 22              | 40.9                        | 0.6                     | 0.009                       |

|    |                       |    |       |     |       |
|----|-----------------------|----|-------|-----|-------|
| 16 | Nuc-Plm-Ske-Cyt       | 20 | 50.0  | 0.6 | 0.090 |
| 17 | Gol-Ske               | 19 | 68.4  | 0.8 | 0.999 |
| 18 | Ske                   | 16 | 56.3  | 0.6 | 0.285 |
| 19 | Nuc-Ske               | 15 | 73.3  | 0.7 | 0.999 |
| 20 | <b><i>Nuc-Plm</i></b> | 13 | 100.0 | 0.8 | 0.013 |
| 21 | ER-Cyt                | 12 | 66.7  | 0.5 | 0.999 |
| 22 | Plm-Gol-Cyt           | 12 | 50.0  | 0.4 | 0.208 |
| 23 | End-Cyt               | 11 | 54.5  | 0.4 | 0.333 |
| 24 | Plm-End-Cyt           | 10 | 80.0  | 0.5 | 0.733 |
